# Supplementary material
Source: publisher figshare collection journal article supplement (https://sage.figshare.com/ndownloader/files/14909417)
Supplement: Supplementary file 3 [file 14909417]

Archive with 2 entries (2 files):
- Kalokerinos_OtherSupplementalAnalysesandFigures.pdf
- Kalokerinos_SupplementalReverseDirectionalAnalyses.pdf
